# Supplementary material for: Dietary Supplementation with Fermented Brassica rapa L. Stimulates Defecation Accompanying Change in Colonic Bacterial Community Structure
Source: MDPI journal article supplement (doi:10.3390/nu13061847), 2021-05-28
Supplement: s1 [file s1]

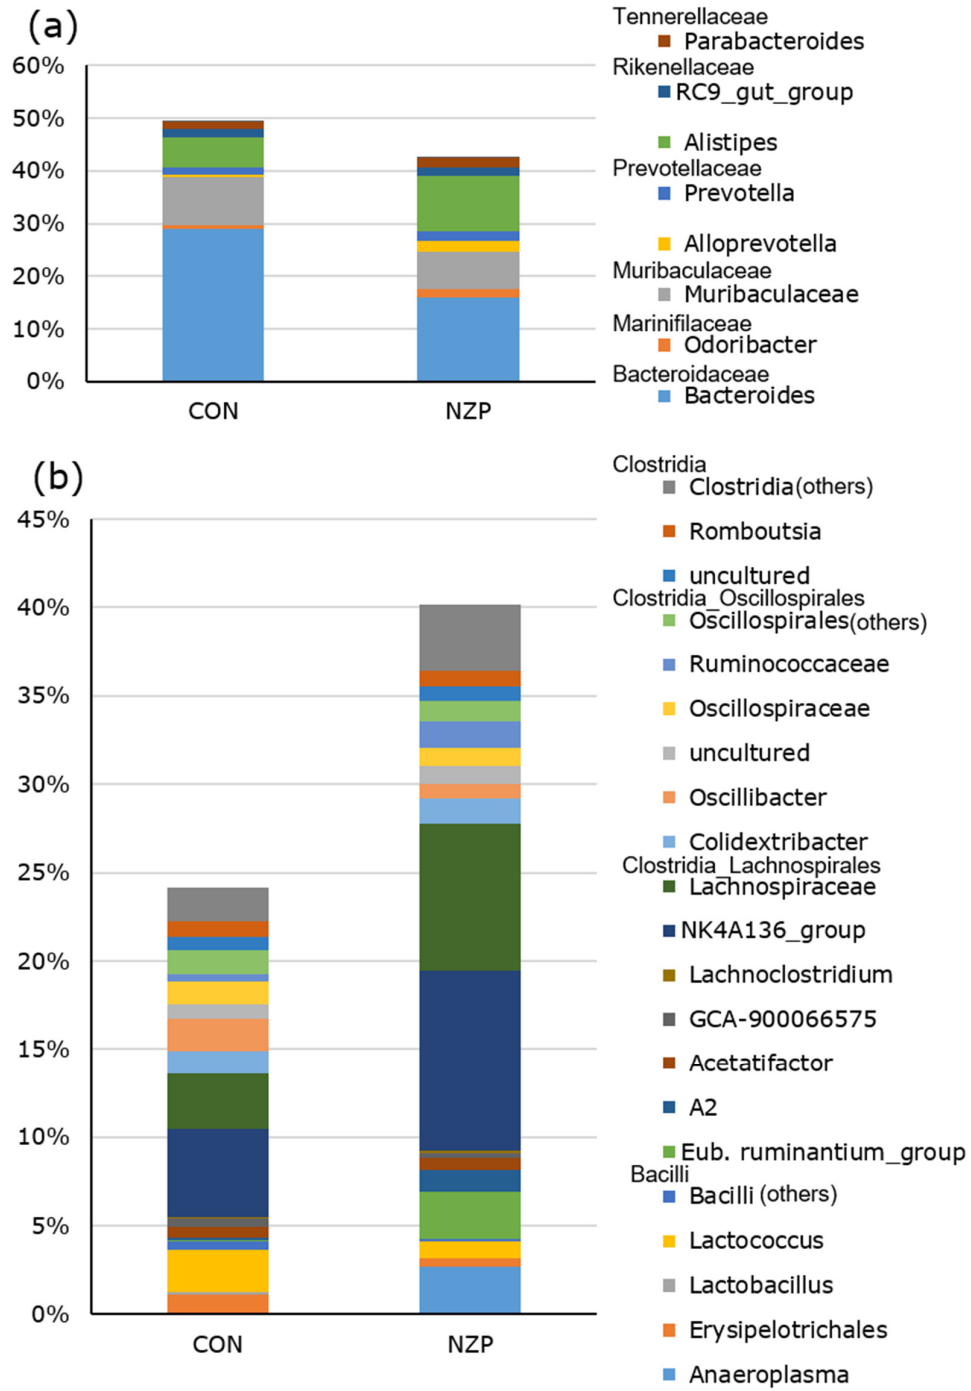

**Figure S1.** Lower level (class, family, and genus) distribution of bacteria in colonic contents sampled on day 14. The distribution belonging to Bacteroidetes (a) and Firmicutes (b) were depicted.

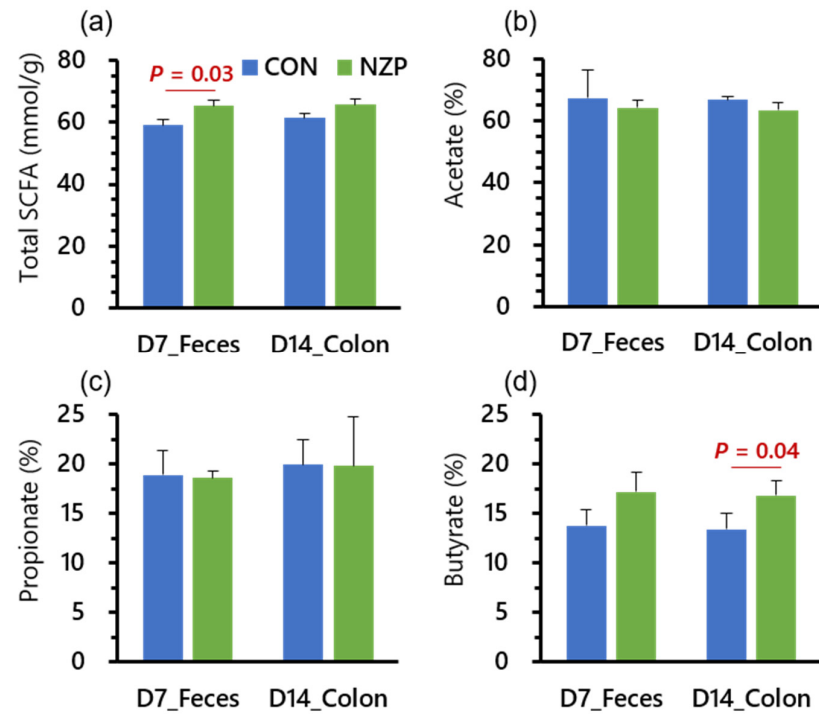

**Figure S2.** Total SCFA concentration in gut content samples (a), and relative molar proportions of acetate (b), propionate (c), and butyrate (d).
